# Supplementary material
Source: MDPI journal article supplement (https://www.mdpi.com/1999-4907/13/8/1288)
Supplement: s1 [file s1]

## Supplementary Materials

**Table S1.** Sites of investigation are reported with codes used for data analysis, coordinates (lon, lat SR: WGS84 UTM32), altitude (alt, m a.s.l.) and solar radiation (solar rad, KWH/m<sup>2</sup>).

| Sites             | Code | Lon    | Lat     | Alt  | Solar Rad |
|-------------------|------|--------|---------|------|-----------|
| A2_Monte Bianco   | A    | 341316 | 5075640 | 1307 | 1226      |
| AF7_Lenteney      | B    | 350448 | 5065962 | 851  | 809       |
| AN13_Buillet      | C    | 358546 | 5060513 | 979  | 867       |
| AN5_Elevaz        | D    | 341679 | 5067384 | 1273 | 1004      |
| AN6_La Fenetre    | E    | 351287 | 5066944 | 1117 | 1168      |
| AN7_Derby         | F    | 351324 | 5065019 | 847  | 844       |
| B5_Arbaz          | G    | 401107 | 5063836 | 1380 | 1308      |
| M8_Gran Brissogne | H    | 375765 | 5063852 | 1122 | 824       |
| MF3_Oyace         | I    | 373024 | 5076999 | 1089 | 864       |
| MF9_Etroubles     | L    | 362853 | 5075438 | 1280 | 1290      |
| MN1_St. Marcel    | M    | 380784 | 5065119 | 836  | 1102      |
| MN13_Valpelline   | N    | 369490 | 5075094 | 895  | 942       |
| MN2_Rean          | O    | 381399 | 5065474 | 701  | 866       |
| MN3_St. Rhemy     | P    | 358069 | 5075298 | 1483 | 1025      |

**Table S2.** Diameters at breast height (DBH, cm) of the sampled trees.

| ID | Tree | DBH |
|----|------|-----|
| 1  | 5166 | 16  |
| 2  | 5170 | 24  |
| 3  | 5171 | 18  |
| 4  | 5172 | 31  |
| 5  | 5173 | 8   |
| 6  | 5617 | 13  |
| 7  | 5618 | 15  |
| 8  | 5620 | 12  |
| 9  | 5100 | 25  |
| 10 | 5601 | 11  |
| 11 | 5605 | 18  |
| 12 | 5606 | 10  |
| 13 | 5609 | 21  |
| 14 | 5080 | 16  |
| 15 | 5081 | 22  |
| 16 | 5082 | 17  |
| 17 | 5063 | 12  |
| 18 | 5064 | 14  |
| 19 | 5065 | 14  |
| 20 | 5704 | 19  |
| 21 | 5992 | 12  |
| 22 | 5995 | 25  |
| 23 | 5161 | 12  |
| 24 | 5162 | 13  |
| 25 | 5165 | 18  |
| 26 | 5746 | 18  |
| 27 | 5747 | 18  |

|    |      |    |
|----|------|----|
| 28 | 5749 | 7  |
| 29 | 5085 | 18 |
| 30 | 5086 | 16 |
| 31 | 5089 | 42 |
| 32 | 5627 | 10 |
| 33 | 5628 | 8  |
| 34 | 5630 | 6  |
| 35 | 1    | 54 |
| 36 | 2    | 16 |
| 37 | 3    | 9  |
| 38 | 5621 | 44 |
| 39 | 5622 | 19 |
| 40 | 5625 | 20 |

---
